# Supplementary material
Source: ML conference proceedings conference paper supplement (https://openreview.net/forum?id=Nkd7AS2USRd)

Loss over epochs

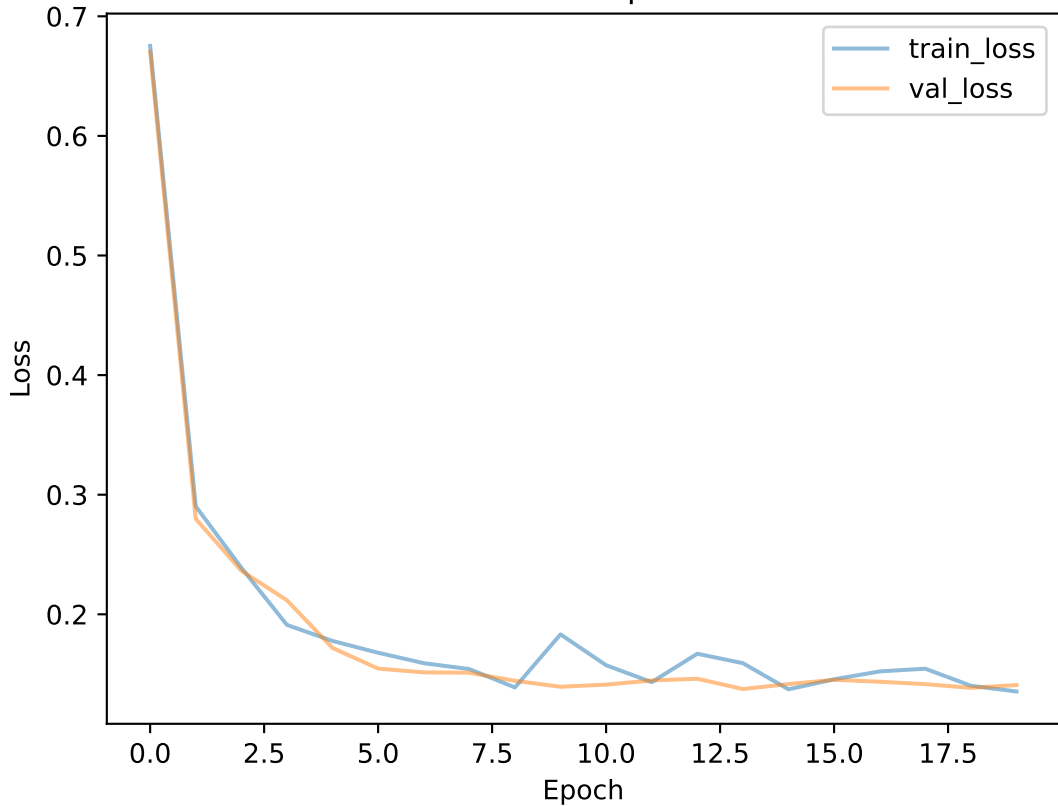

Supplement: supplementary_material [file attachment]
